# Supplementary material for: The First Complete Mitochondrial Genome of the Genus Litostrophus: Insights into the Rearrangement and Evolution of Mitochondrial Genomes in Diplopoda
Source: MDPI journal article supplement (doi:10.3390/genes15020254), 2024-02-18
Supplement: s1 [file s1]

**Table S1:** The best-fit models obtained using ModelFinder for ML and BI trees.

| Tree | Subset partitions                                       | Best-fit model |
|------|---------------------------------------------------------|----------------|
| ML   | CYTB, ATP6, COX2, ND3                                   | GTR+F+I+G4     |
|      | ATP8, trnS1                                             | HKY+F+I+G4     |
|      | COX1, COX2                                              | TIM2+F+I+I+R4  |
|      | ND1, ND4L, ND4, ND5, trnT, trnC                         | GTR+F+R5       |
|      | ND2, ND6, trnW, trnP, trnI                              | TIM3+F+I+G4    |
|      | trnY, trnV, trnS2, trnR, trnQ, trnN, trnM, trnL1, trnH, | TVM+F+R4       |
|      | trnG, trnF, trnE, trnD, trnA, rrnS, rrnL                |                |
|      | trnL2, trnK                                             | TVM+F+G4       |
| BI   | CYTB, ATP6, COX2, ND3                                   | GTR+F+I+G4     |
|      | ATP8, trnS1                                             | HKY+F+I+G4     |
|      | COX1, COX2                                              | GTR+F+I+G4     |
|      | ND1, ND4L, ND4, ND5, trnT, trnC                         | GTR+F+I+G4     |
|      | ND2, ND6, trnW, trnP, trnI                              | GTR+F+I+G4     |
|      | trnY, trnV, trnS2, trnR, trnQ, trnN, trnM, trnL1, trnH, | GTR+F+G4       |
|      | trnG, trnF, trnE, trnD, trnA, rrnS, rrnL                |                |
|      | trnL2, trnK                                             | GTR+F+G4       |
